# Supplementary material for: Antifungal Activity of Hop Leaf Extracts and Xanthohumol on Two Strains of Venturia inaequalis with Different Sensitivities to Triazoles
Source: MDPI journal article supplement (doi:10.3390/microorganisms11061605), 2023-06-17
Supplement: s1 [file s1]

## Supplementary Materials

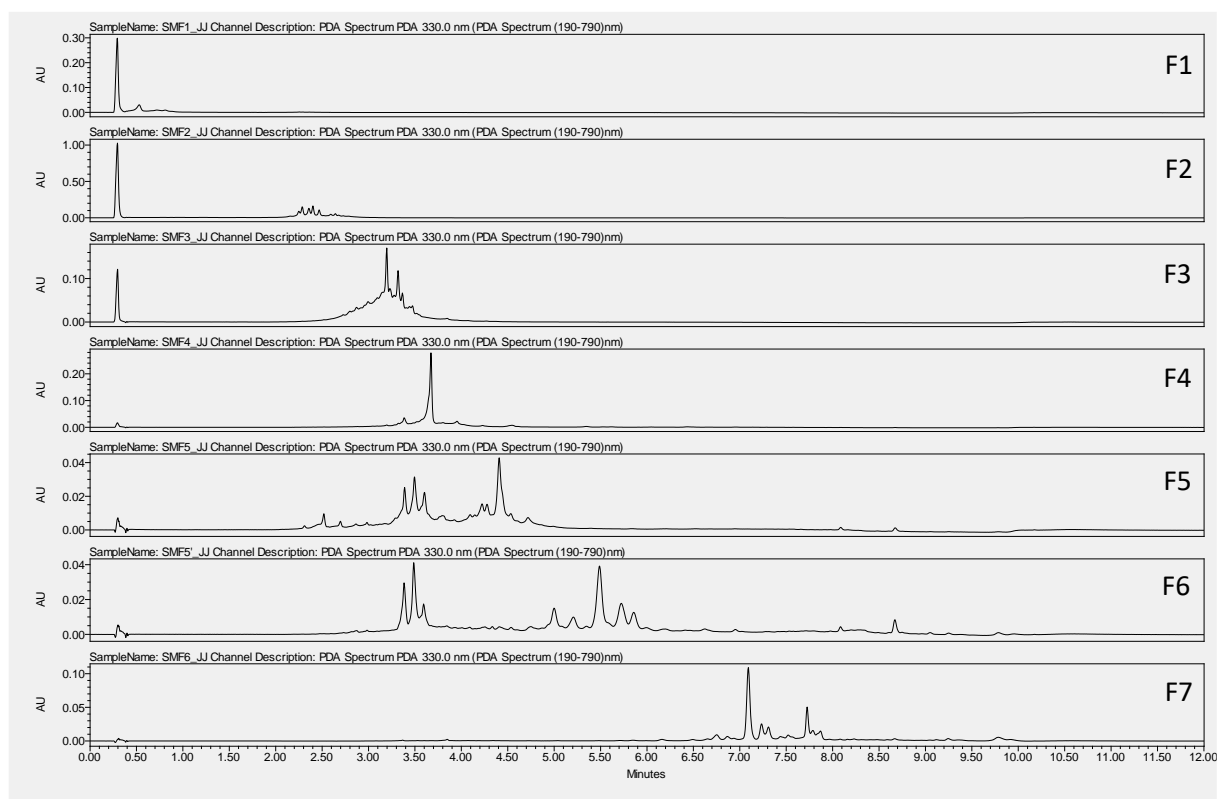

**Figure S1.** Chromatograms by UPLC-UV-MS at 330 nm (method 1) of all fractions obtained from hop leaf DSE after preparative HPLC

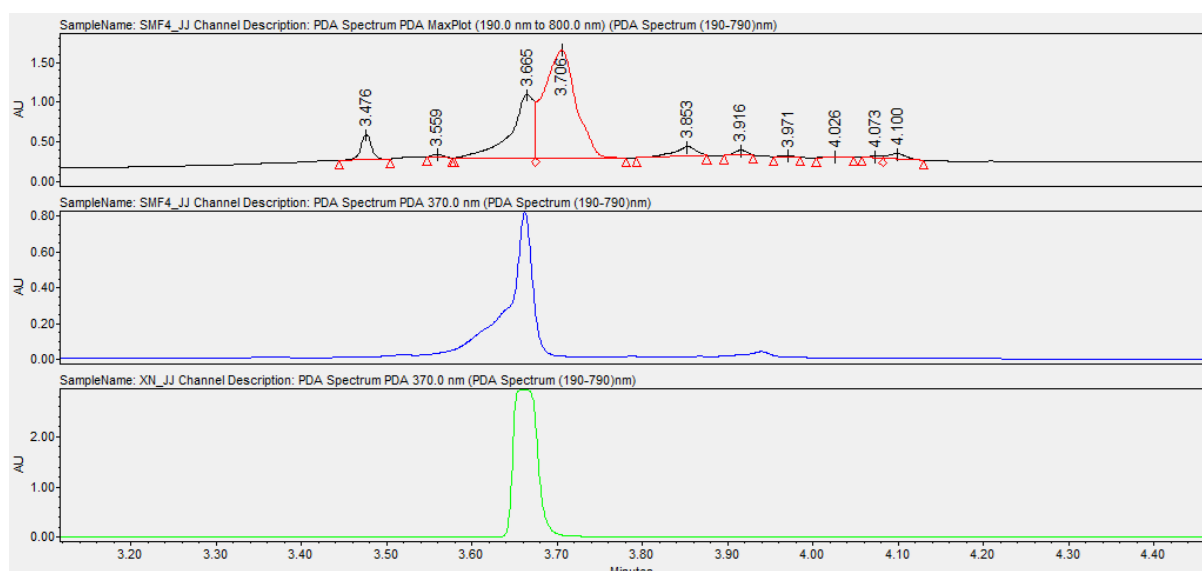

| E  | Name | Retention Time (min) | Area (μV*sec) | % Area | Height (μV) | Signal_to_Noise_Value |
|----|------|----------------------|---------------|--------|-------------|-----------------------|
| 1  |      | 3.476                | 267406        | 4.69   | 311523      |                       |
| 2  |      | 3.559                | 32132         | 0.56   | 36669       |                       |
| 3  |      | 3.665                | 1506435       | 26.42  | 791937      |                       |
| 4  |      | 3.706                | 3485673       | 61.12  | 1348596     |                       |
| 5  |      | 3.853                | 203307        | 3.57   | 116541      |                       |
| 6  |      | 3.916                | 61079         | 1.07   | 60890       |                       |
| 7  |      | 3.971                | 15216         | 0.27   | 15352       |                       |
| 8  |      | 4.026                | 14191         | 0.25   | 10791       |                       |
| 9  |      | 4.073                | 24516         | 0.43   | 21919       |                       |
| 10 |      | 4.100                | 92848         | 1.63   | 65388       |                       |

**Figure S2.** Purity of xanthohumol in fraction F4 on the basis of PDA chromatogram (method 1)

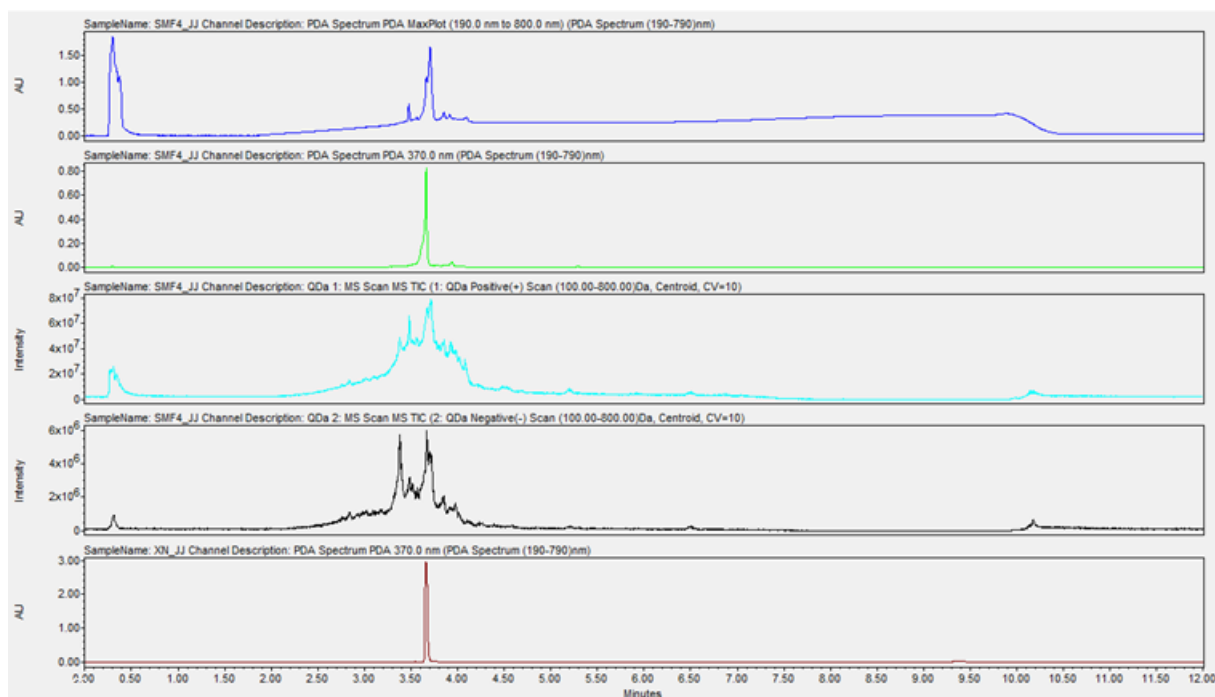

**Figure S3.** Chromatograms obtained by UPLC-UV-MS (method 1) of F4 (MaxPlot, 370 nm, TIC in positive mode, TIC in negative mode) and xanthohumol purified from hop cones (370 nm).

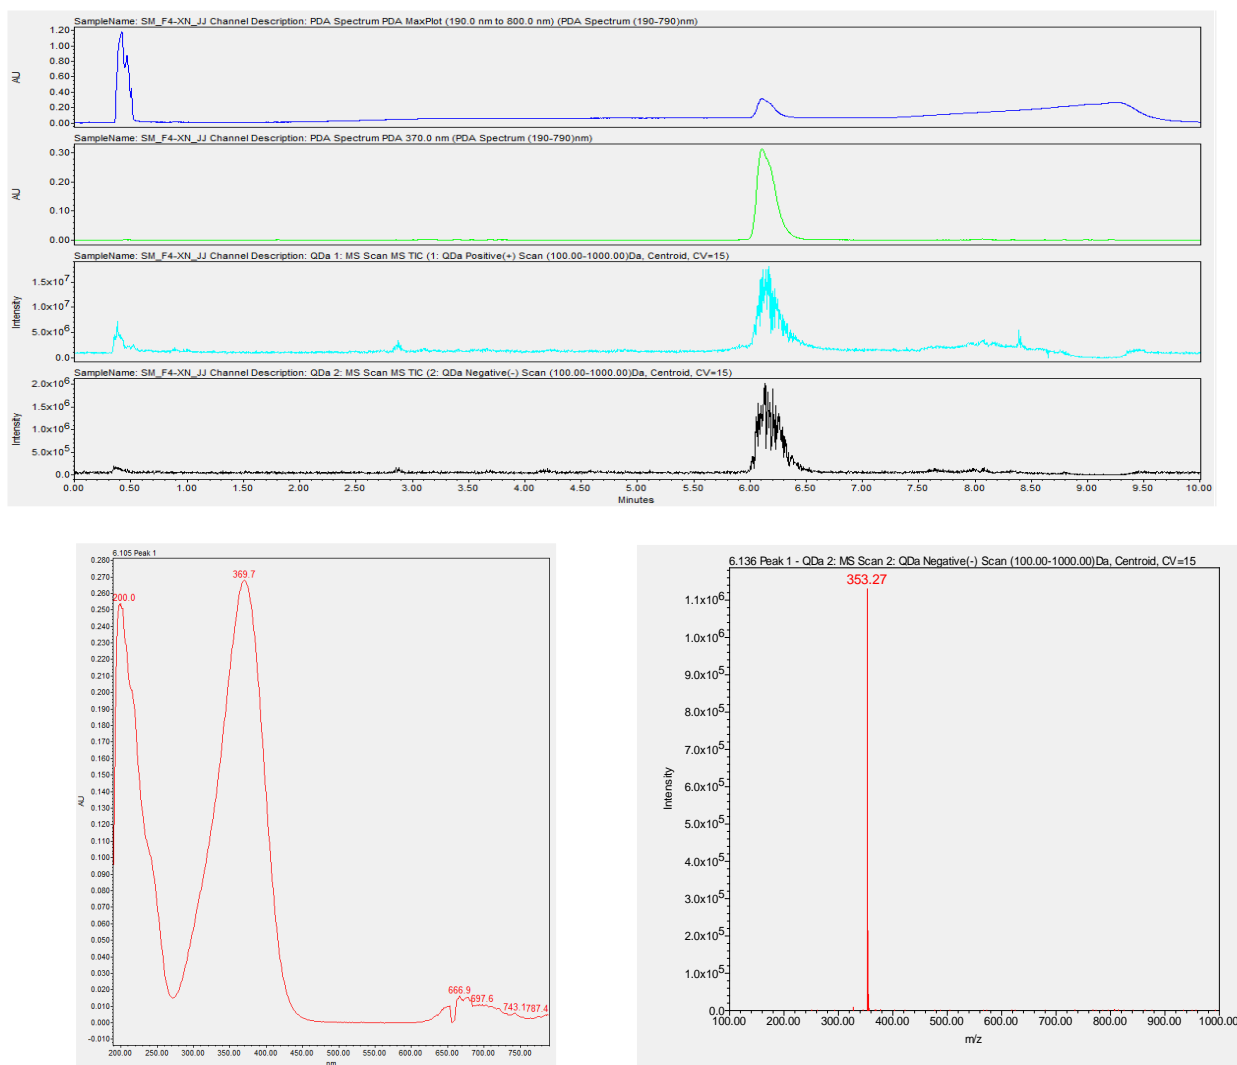

**Figure S4.** Chromatograms obtained by UPLC-UV-MS (method 2) of xanthohumol purified from hop leaves (MaxPlot, 370 nm, TIC in positive mode, TIC in negative mode) as well as UV spectrum and mass spectrum

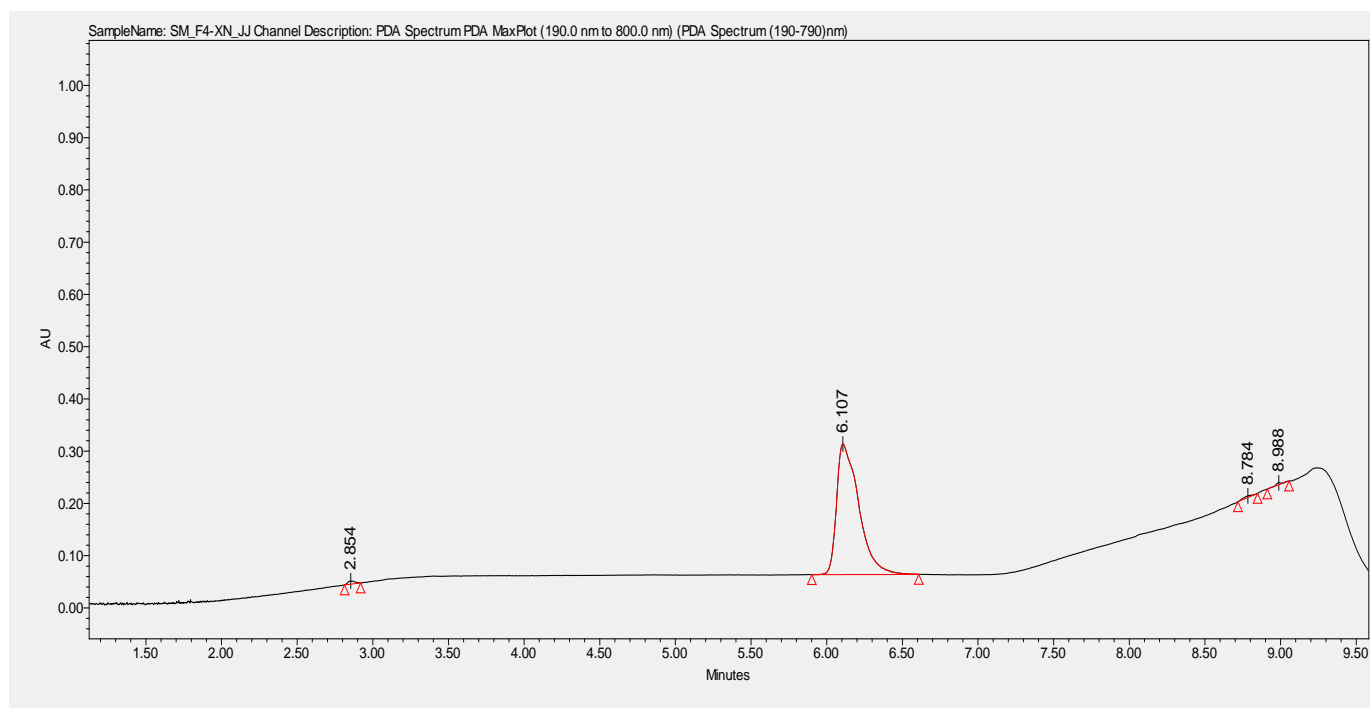

|   | Name | Retention Time (min) | Area ( $\mu\text{V}\cdot\text{sec}$ ) | % Area | Height ( $\mu\text{V}$ ) | Signal_to_Noise_Value |
|---|------|----------------------|---------------------------------------|--------|--------------------------|-----------------------|
| 1 |      | 2.855                | 9830                                  | 0.43   | 4246                     |                       |
| 2 |      | 6.107                | 2261497                               | 99.06  | 240441                   |                       |
| 3 |      | 8.055                | 1079                                  | 0.05   | 843                      |                       |
| 4 |      | 8.784                | 5745                                  | 0.25   | 2102                     |                       |
| 5 |      | 8.989                | 4836                                  | 0.21   | 3055                     |                       |

**Figure S5.** Purity of xanthohumol purified from hop leaves on the basis of PDA chromatogram (method 2)

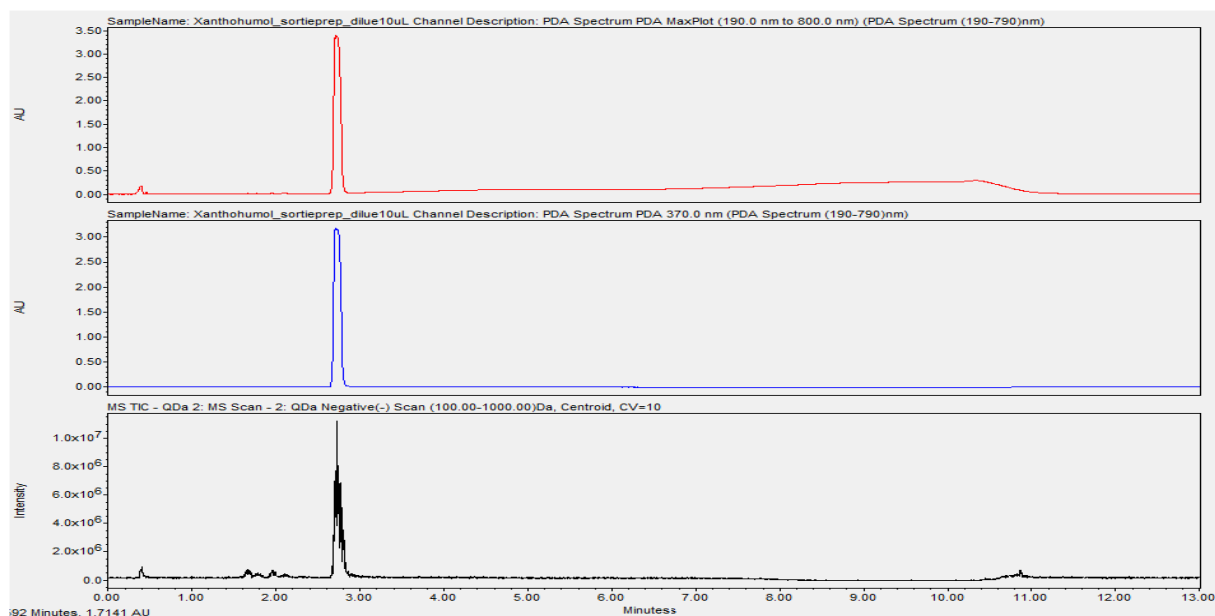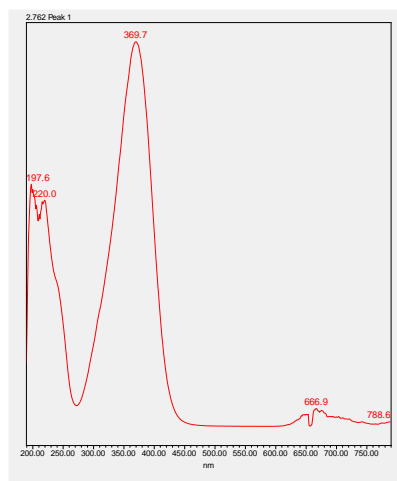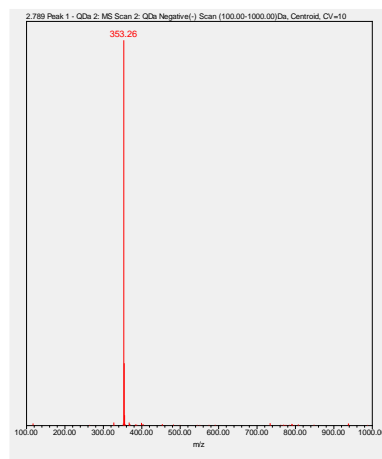

**Figure S6.** Chromatograms obtained by UPLC-UV-MS (method 3) of xanthohumol purified from hop cones (Max Plot, 370 nm, TIC in negative mode) as well as UV spectrum and mass spectrum
